# Supplementary figures and images for: Electrolytic lesions within central complex neuropils of the cockroach brain affect negotiation of barriers
Source: Oxford University Press journal article supplement (doi:10.1242/jeb.042499), 2010-07-30

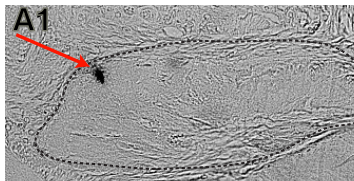

**Ink path left by probe**

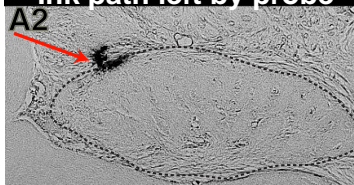

**Lesion marked by ink**

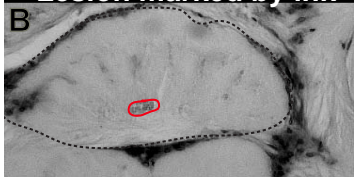

**Lesion within the CC**

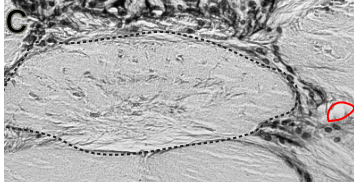

**Lesion outside the CC**

Supplement: jeb042499figs1.pdf [file jeb042499figs1.pdf]

**A**

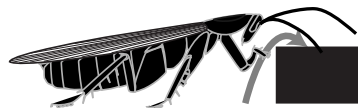

**B**

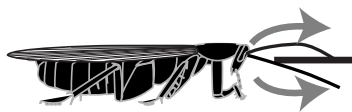

**D**

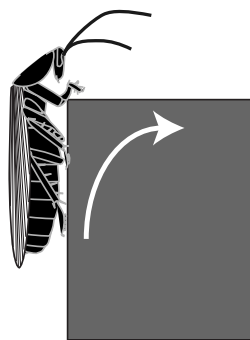

**C**

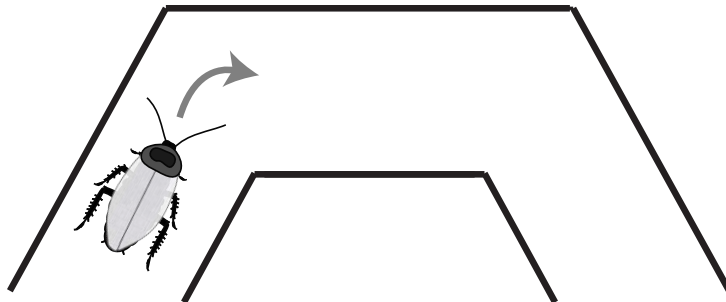

Supplement: jeb042499figs3.pdf [file jeb042499figs3.pdf]

**A**Antennal  
Contact

Step 1

Step 2

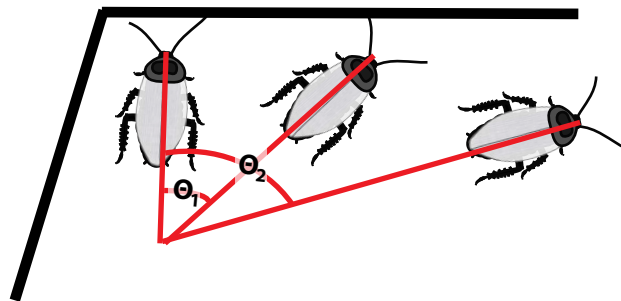**B**

Normal Turn

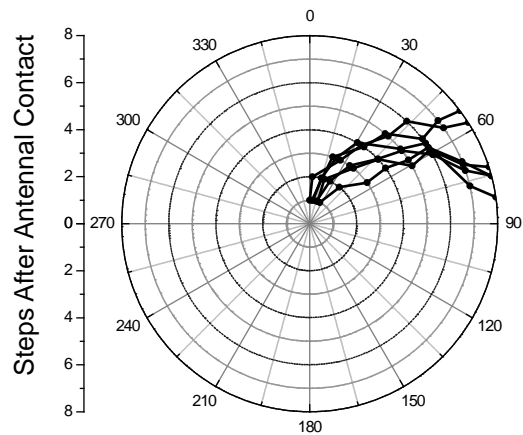**C**

Wrong Direction

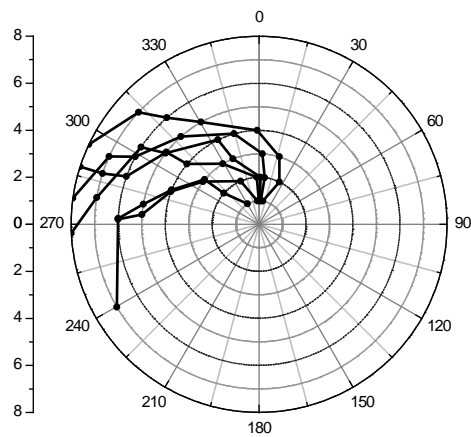**D**

Failure to Turn

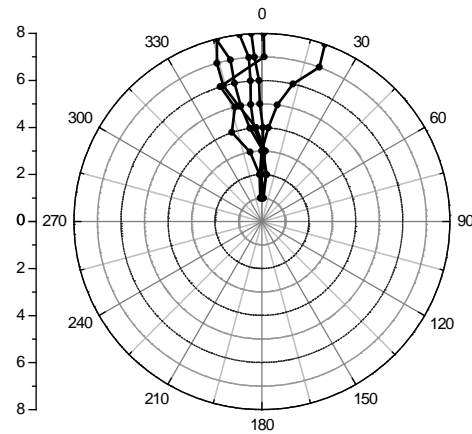

Supplement: jeb042499figs4.pdf [file jeb042499figs4.pdf]

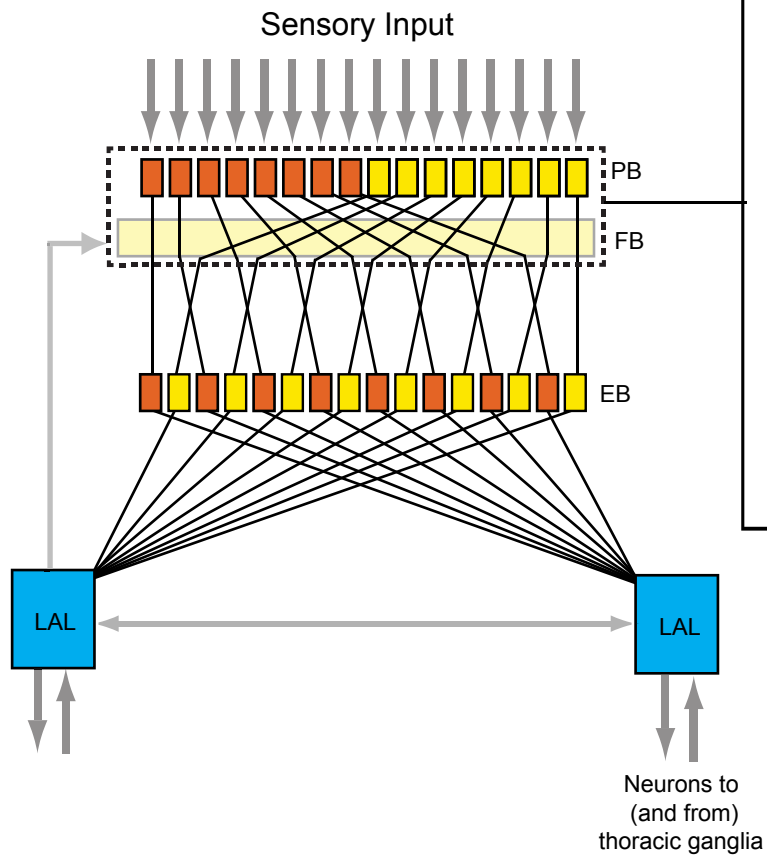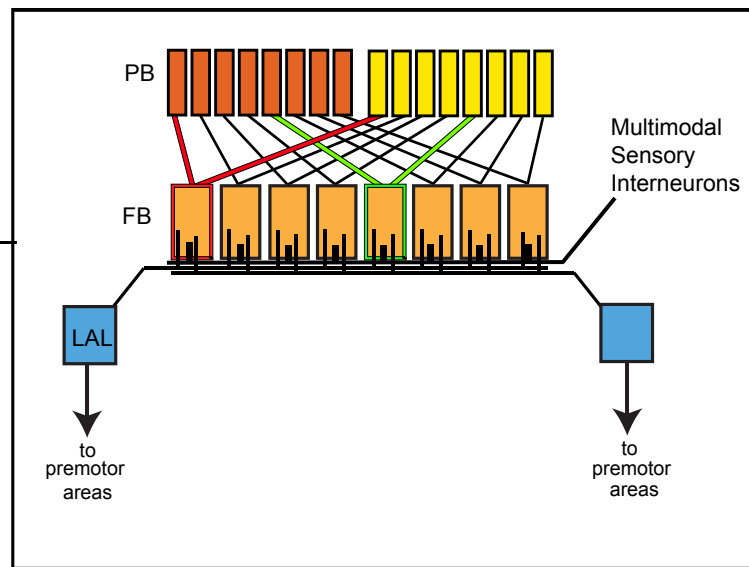

Supplement: jeb042499figs5.pdf [file jeb042499figs5.pdf]
